# Supplementary material for: Spousal support during pregnancy in the Nigerian rural context: a mixed methods study
Source: PubMed Central journal article supplement (PMC8591893; doi:10.1186/s12884-021-04135-3), 2021-11-15
Supplement: 12884_2021_4135_MOESM2_ESM.pdf [file 12884_2021_4135_MOESM2_ESM.pdf]

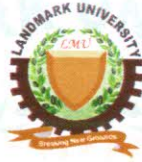

# Landmark University

PMB 1001, Omu-Aran, Kwara State  
www.lmu.edu.ng

**CENTRE FOR RESEARCH, INNOVATION  
AND DISCOVERIES (LUCRID)**

Chancellor: DR. DAVID OYEDEPO (FNAE)  
Vice-Chancellor: PROFESSOR ADENIYI OLAYANJU  
Registrar: OYINLOYE, A. FOLA (MNIM)

Director: Prof. B. O. Adebisin  
Email: dlucid@lmu.edu.ng

Breaking New Grounds

26<sup>th</sup> May 2021

Editor-in-Chief,  
BMC pregnancy and Child Journal

## COMPLIANCE WITH ETHICAL STANDARDS

I write to attest and approve that Dr. Chisaa, IGBOLEKWU (of the Department of Sociology, Landmark University) et al., complied with all ethical standards involving the use of human subjects in her research work titled "Spousal Support during Pregnancy in Nigerian Rural Context". Statements or testimonies of the participants will remain confidential and shall only be used for research purposes.

Kind regards.

Professor. B.O. Adebisin  
Director, LUCRID
